# Supplementary material
Source: HighWire-hosted journal article supplement (https://bmjopenquality.bmj.com/content/13/1/e002467)
Supplement: inline-supplementary-material-2 [file inline-supplementary-material-2.pdf]

# PDSA 1

## Trainee Review Clinic Protocol: Development Phase

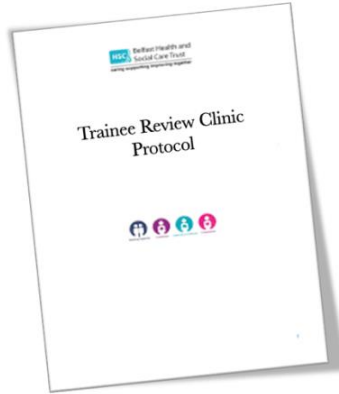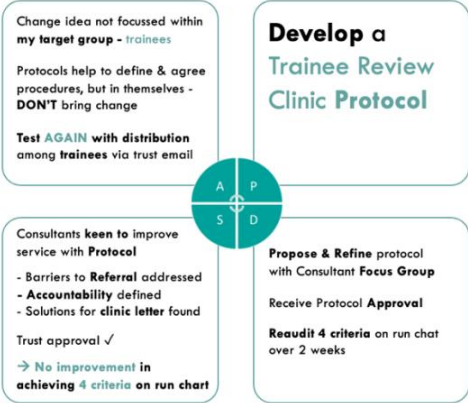

# PDSA 2

## Trainee Review Clinic Protocol: Distribution Phase

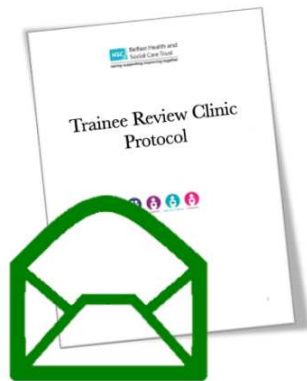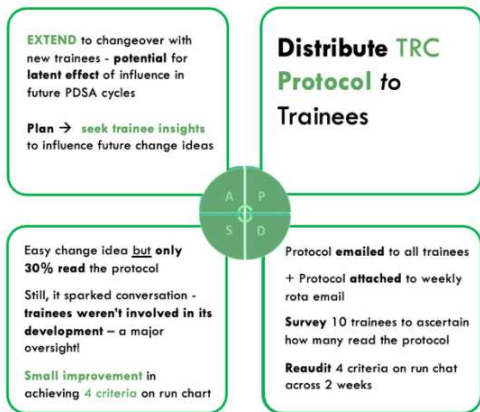

# PDSA 3

## Trainee Review Clinic : Troubleshooting Session

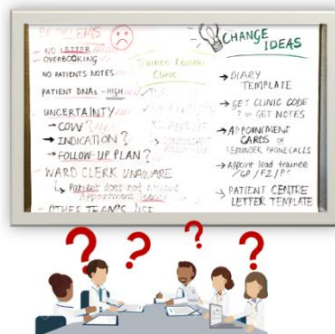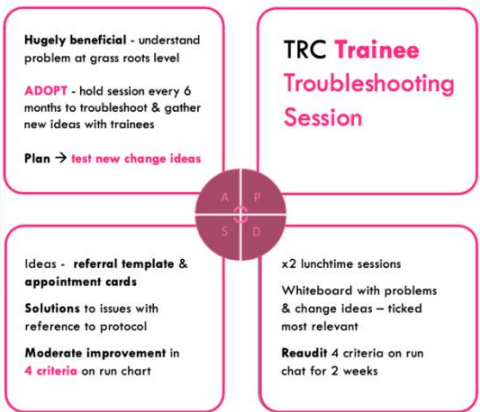

# PDSA 4

## Trainee Review Clinic Protocol: Referral Proforma

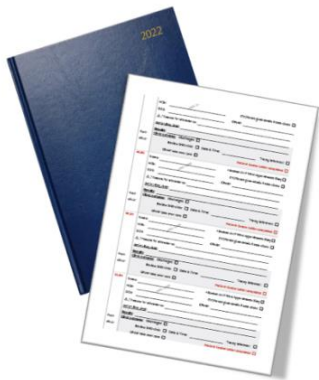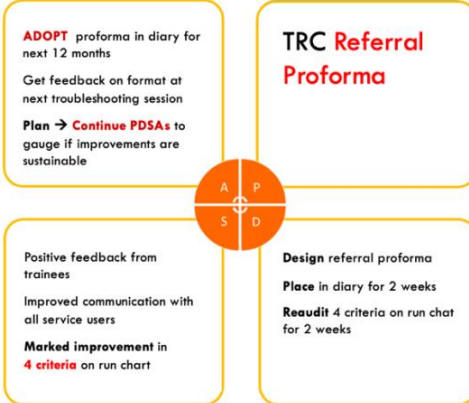

# PDSA 5

## Trainee Review Clinic Protocol: Appointment Cards

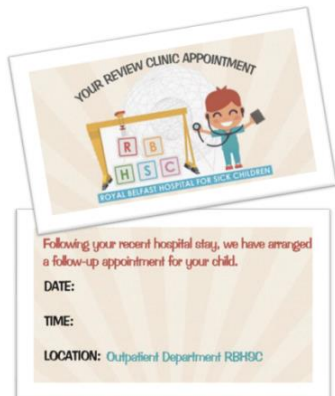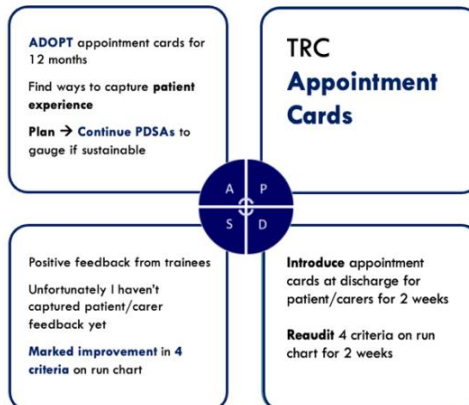

Supplement 2. PDSA of 6 test cycles in series
