# Supplementary material
Source: HighWire-hosted journal article supplement (https://bmjopenquality.bmj.com/content/13/1/e002467)

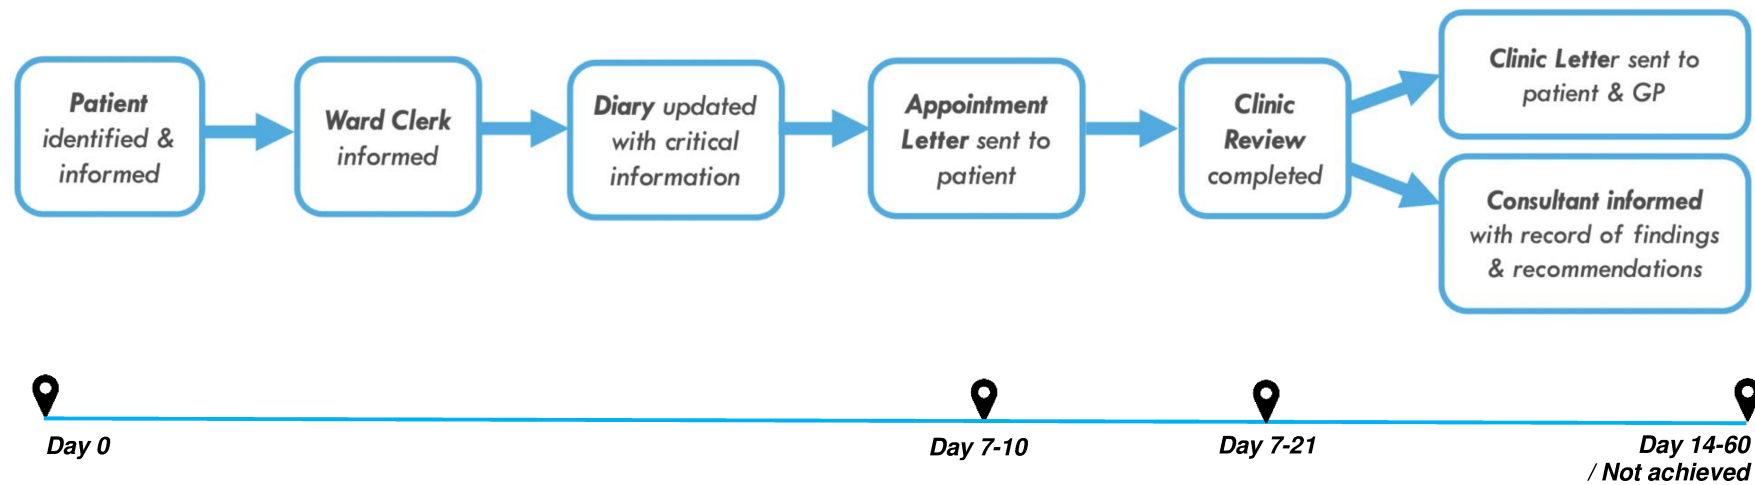

Supplement 1. High Level Process Map

Supplement: inline-supplementary-material-1 [file inline-supplementary-material-1.pdf]
